# Supplementary material
Source: publisher figshare collection journal article supplement (https://wiley.figshare.com/articles/dataset/_/3531302)
Supplement: Supplementary file 1 [file 1 › appendix-A.htm]

Ecological Archives E090-115-A1


### *Ecological Archives* E090-115-A1

### **Abhyudai Singh, William W. Murdoch, and Roger M. Nisbet. 2009. Skewed attacks, stability, and host suppression. *Ecology* 90:1679–1686.**

Appendix A. Different interpretations of risk. Click here for a PDF file of the appendix.


---


[Back to E090-115]
